# Supplementary material for: Ru-assisted synthesis of Pd/Ru nanodendrites with high activity for ethanol electrooxidation
Source: Royal Society of Chemistry journal article supplement (doi:10.1039/c5nr02713f), 2015-01-01
Supplement: c5nr02713f1.pdf [file c5nr02713f1.pdf]

## Electronic Supplementary Information

### Ru-assisted synthesis of Pd/Ru nanodendrites with high activity for ethanol electrooxidation

Ke Zhang, Duan Bin, Beibei Yang, Caiqin Wang, Fangfang Ren, Yukou Du\*  
College of Chemistry, Chemical Engineering and Materials Science, Soochow University, Suzhou 215123, P. R. China. E-mail: [duyk@suda.edu.cn](mailto:duyk@suda.edu.cn)

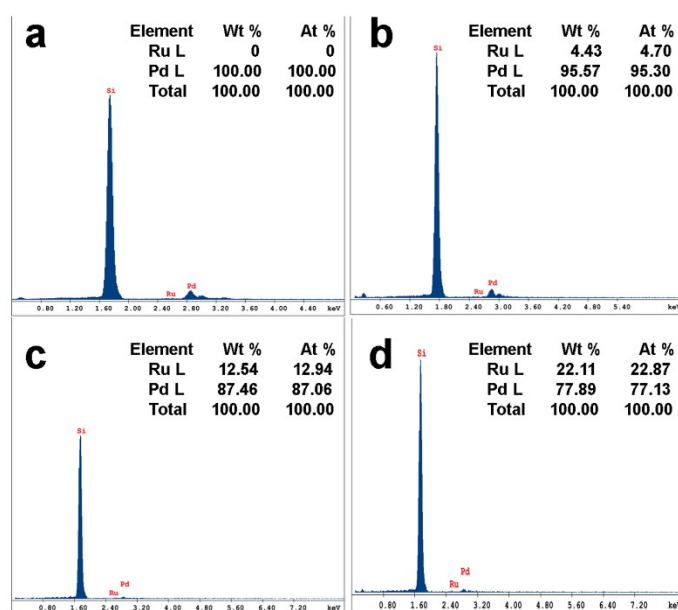

Figure S1 EDS patterns of the Pd (a), Pd<sub>20</sub>/Ru<sub>1</sub> (b), Pd<sub>7</sub>/Ru<sub>1</sub> (c) and Pd<sub>3</sub>/Ru<sub>1</sub> (d). Slide glass were used as EDS substrates.

| Table S1 Summary of molar ratios for catalysts based on EDS and ICP analysis |                            |                            |
|------------------------------------------------------------------------------|----------------------------|----------------------------|
| Catalysts                                                                    | Molar ratio by EDS (Pd/Ru) | Molar ratio by ICP (Pd/Ru) |
| Pd <sub>20</sub> /Ru <sub>1</sub>                                            | 20.28/1                    | 22.20/1                    |
| Pd <sub>7</sub> /Ru <sub>1</sub>                                             | 6.73/1                     | 6.76/1                     |
| Pd <sub>3</sub> /Ru <sub>1</sub>                                             | 3.37/1                     | 3.91/1                     |

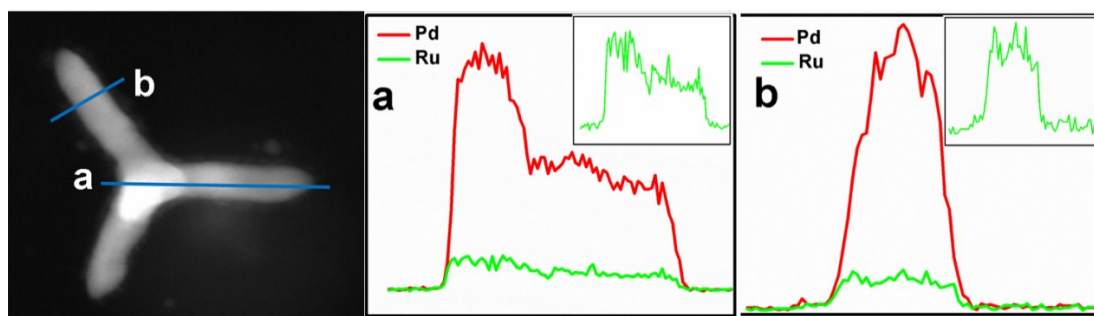

Figure S2 EDX line scan profile of Pd<sub>7</sub>/Ru<sub>1</sub> nanocomposite.

From the line-scanning profile across the particle, the intensity of the Pd-L line is somewhat stronger than that of the Ru-L line, but they are similar in shape, indicating a uniform distribution of both Pd and Ru atoms within the alloy nanoparticles.

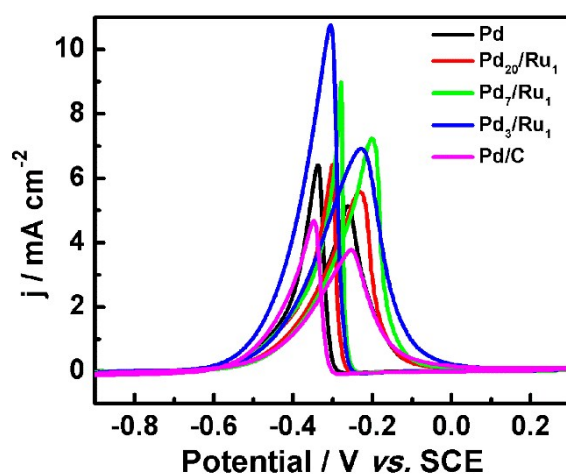

Figure S3 CVs of Pd, Pd<sub>20</sub>/Ru<sub>1</sub>, Pd<sub>7</sub>/Ru<sub>1</sub>, Pd<sub>3</sub>/Ru<sub>1</sub> and Pd/C catalysts in 1.0 M CH<sub>3</sub>CH<sub>2</sub>OH + 1.0 M KOH at a scan rate of 50 mV s<sup>-1</sup>.

Figure S3 shows the CVs of ethanol oxidation on Pd, Pd<sub>20</sub>/Ru<sub>1</sub>, Pd<sub>7</sub>/Ru<sub>1</sub>, Pd<sub>3</sub>/Ru<sub>1</sub> and Pd/C catalysts in 1.0 M CH<sub>3</sub>CH<sub>2</sub>OH + 1.0 M KOH at a scan rate of 50 mV s<sup>-1</sup>. The current densities are normalized to the ECSA. As shown in Figure S3, the Pd<sub>7</sub>/Ru<sub>1</sub> catalyst exhibits higher current density toward ethanol oxidation than any other catalysts. Besides, all the Pd/Ru catalysts exhibit higher current densities than that of Pd, which are basically consistent with the results of Figure 5 in the manuscript.

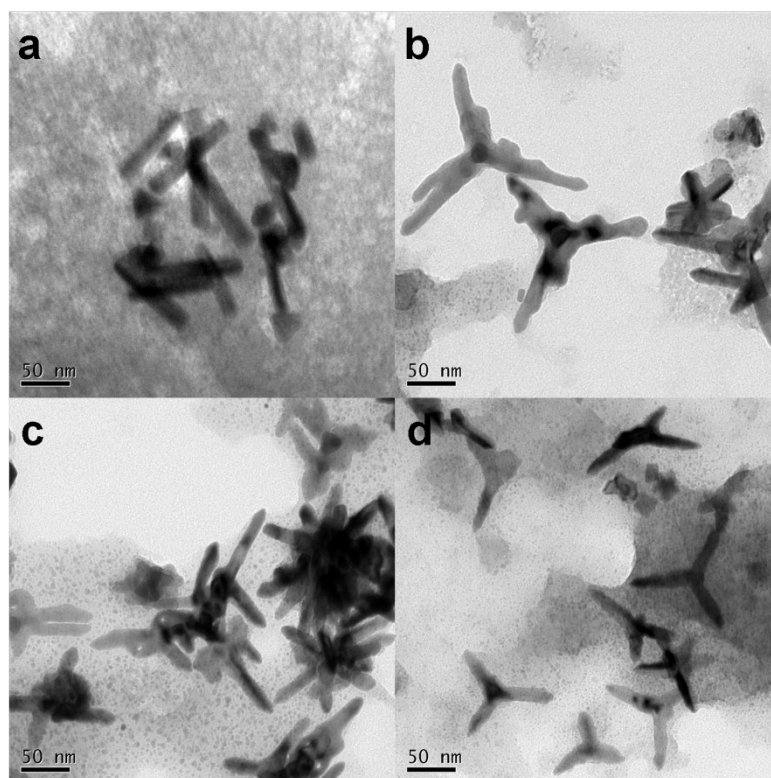

Figure S4 Representative TEM images of Pd (a), Pd<sub>20</sub>/Ru<sub>1</sub> (b), Pd<sub>7</sub>/Ru<sub>1</sub> (c) and Pd<sub>3</sub>/Ru<sub>1</sub> (d) after chronoamperometric test of 3600 s.

As shown in Figure S4, it is clearly observed that some Pd nanoparticles aggregate after durability test (Figure S4a). While for Pd/Ru catalyst, the Pd/Ru nanoparticles are still distributed well and almost have no obvious changes after chronoamperometric experiment.
